# Supplementary material for: Ammonium persulfate assisted synthesis of ant-nest-like hierarchical porous carbons derived from chitosan for high-performance supercapacitors and zinc-ion hybrid capacitors
Source: Royal Society of Chemistry journal article supplement (doi:10.1039/d3ta07922h), 2024-01-01
Supplement: d3ta07922h1.pdf [file d3ta07922h1.pdf]

## Supporting Information

### **Ammonium Persulfate Assisted Synthesis of Ant-Nest-Like Hierarchical Porous Carbons Derived from Chitosan for High-Performance Supercapacitors and Zinc-Ion Hybrid Capacitors**

Gui Chen,<sup>a</sup> Shaozhen Chen,<sup>a</sup> Xiaoyan Wu,<sup>a</sup> Caijuan Wu,<sup>b</sup> Yong Xiao,<sup>a</sup> Hanwu Dong,<sup>a</sup> Xiaoyuan Yu,<sup>a</sup> Yeru Liang,<sup>a\*</sup> Hang Hu,<sup>a,\*</sup> Mingtao Zheng<sup>a,b,\*</sup>

<sup>a</sup> Key Laboratory for Biobased Materials and Energy of Ministry of Education/ Guangdong Provincial Engineering Technology Research Center for Optical Agriculture, College of Materials and Energy, South China Agricultural University, Guangzhou 510642, China

<sup>b</sup> Maoming Branch, Guangdong Laboratory of Lingnan Modern Agriculture, Maoming 525000, China

\* Corresponding authors. E-mail: [mtzheng@scau.edu.cn](mailto:mtzheng@scau.edu.cn) (M. Zheng), [huhang@scau.edu.cn](mailto:huhang@scau.edu.cn) (H. Hu), [liangyr@scau.edu.cn](mailto:liangyr@scau.edu.cn) (Y. Liang)

## Density Functional Theory Calculations

DFT calculations were conducted using the Gaussian 09 package. For conformation optimization and single energy calculations, the DFT functionals B3LYP and PBE0 were selected. These functionals account for 20% and 25% Hartree–Fock (HF) hybrid contributions, respectively. However, both B3LYP and PBE0 do not adequately describe the dispersion effects in each system. To address this, the DFT-D3 method developed by Grimme was employed to incorporate dispersion effects.

In terms of the basis set, we chose def2-svp for structure optimization and def2-tzvp for energy calculations. This choice strikes a balance between computational accuracy and efficiency.

Given the presence of both odd and even numbers of electrons in the complex system under investigation, we performed both restricted (close shell) and non-restricted (open shell) spin calculations. These calculations corresponded to singlet ( $S = 0$ ) and doublet ( $S = 1$ ) spin multiplicities, where  $M = 2S + 1$ . The adsorption energy ( $\Delta E_{\text{ads}}$ ) of metal adsorption on the surface is defined as:

$$\Delta E_{\text{ads}} = E(\text{complex}) - E(\text{adulterate}) - E(\text{metal})$$

where  $E(\text{complex})$  is the energy of the optimized structure of the bonded complex,  $E(\text{adulterate})$  is the energy of the optimized structure of the material without bonded metal ions, and  $E(\text{metal})$  is the energy of the metal ion. According to this definition, negative adsorption energy suggests that the adsorption process is exothermic and the adsorption system is thermodynamically stable. Contrarily, a positive value corresponds to endothermic and unstable adsorption.

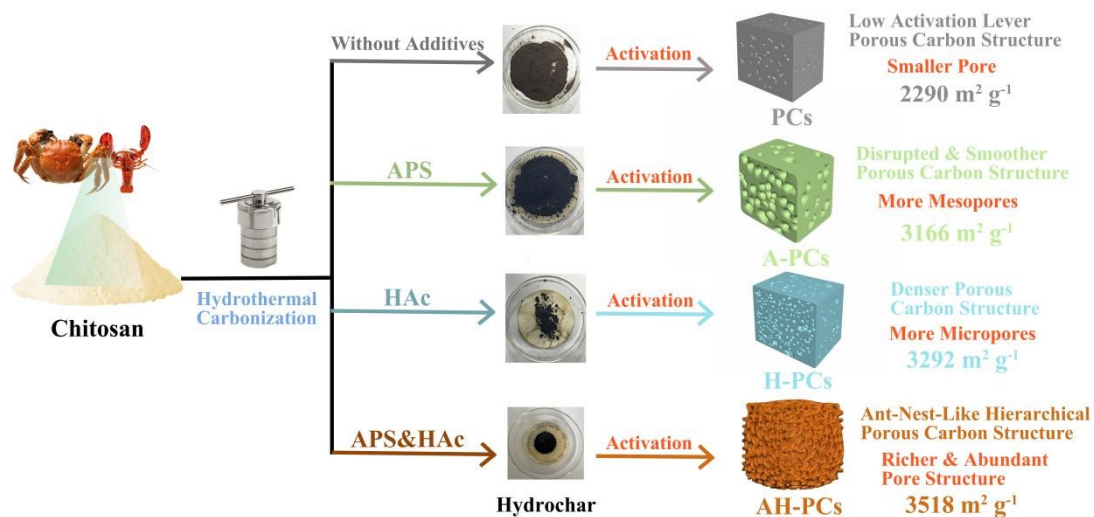

**Scheme S1.** Schematic of the synthesis of the chitosan-derived porous carbons.

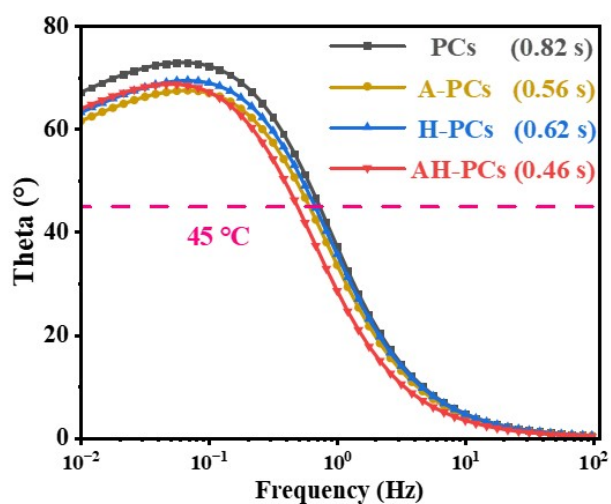

**Figure S1.** Bode plots.

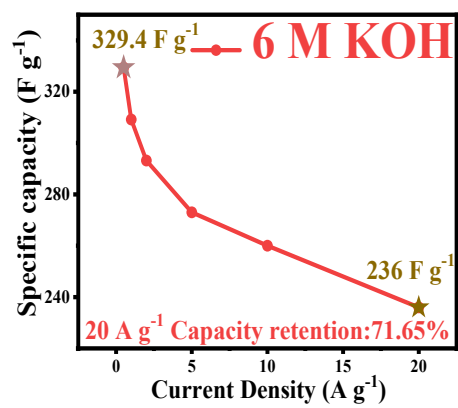

**Figure S2.** The specific capacitance at various current densities of AH-PCs in 6 M KOH Solution symmetric supercapacitors.

**Table S1.** The detailed parameters of specific surface area and pore volume.

| Sample | $S_{\text{BET}}$<br>( $\text{m}^2 \text{g}^{-1}$ ) | $S_{\text{mic}}$<br>( $\text{m}^2 \text{g}^{-1}$ ) | $S_{\text{meso}}$ ( $\text{m}^2 \text{g}^{-1}$ ) | $V_{\text{t}}$ ( $\text{cm}^3$<br>$\text{g}^{-1}$ ) | $V_{\text{mic}}$<br>( $\text{cm}^3 \text{g}^{-1}$ ) | $V_{\text{meso}}$<br>( $\text{cm}^3 \text{g}^{-1}$ ) |
|--------|----------------------------------------------------|----------------------------------------------------|--------------------------------------------------|-----------------------------------------------------|-----------------------------------------------------|------------------------------------------------------|
| PCs    | 2290                                               | 2122                                               | 168                                              | 0.93                                                | 0.82                                                | 0.11                                                 |
| A-PCs  | 3166                                               | 2122                                               | 1043                                             | 1.70                                                | 0.88                                                | 0.82                                                 |
| H-PCs  | 3292                                               | 2612                                               | 680                                              | 1.54                                                | 1.07                                                | 0.47                                                 |
| AH-PCs | 3518                                               | 2937                                               | 581                                              | 1.57                                                | 1.22                                                | 0.35                                                 |

$S_{\text{BET}}$ : specific Brunauer-Emmett-Teller surface area;

$S_{\text{mic}}$ : micropore surface area;

$S_{\text{meso}}$ : mesopore surface area;

$V_{\text{t}}$ : total pore volume;

$V_{\text{mic}}$ : micropore volume;

$V_{\text{meso}}$ : mesopore volume

**Table S2.** Surface element content of all samples calculated by XPS spectra.

| Samples | C     | N    | O     | % of total N1s |       |       |       | % of total O1s |       |       |
|---------|-------|------|-------|----------------|-------|-------|-------|----------------|-------|-------|
|         |       |      |       | N-6            | N-5   | N-Q   | N-X   | C-O            | C=O   | O-C=O |
| PCs     | 87.95 | 1.47 | 10.58 | 10.97          | 56.63 | 19.54 | 12.86 | 32.12          | 29.42 | 38.39 |
| A-PCs   | 83.92 | 1.82 | 14.26 | 26.00          | 44.95 | 17.04 | 12.00 | 5.16           | 45.65 | 49.19 |
| H-PCs   | 84.05 | 1.93 | 14.02 | 20.71          | 43.39 | 22.08 | 13.02 | 5.67           | 60.94 | 33.39 |
| AH-PCs  | 78.51 | 2.74 | 18.75 | 21.82          | 47.61 | 20.75 | 9.82  | 3.67           | 57.66 | 38.67 |

**Table S3.** Comparison of BET surface area and capacitance in of AH-PCs and previously reported chitosan-derived porous carbon materials in KOH as electrolyte in three-electrode system.

| Pretreatment                                                                         | Activation agent                                                                                | Measurement condition          | BET surface area (m <sup>2</sup> g <sup>-1</sup> ) | Capacitance (F g <sup>-1</sup> ) | Ref       |
|--------------------------------------------------------------------------------------|-------------------------------------------------------------------------------------------------|--------------------------------|----------------------------------------------------|----------------------------------|-----------|
| Mg(CH <sub>3</sub> COO) <sub>2</sub> ·4H <sub>2</sub> O                              | KOH                                                                                             | 0.5 A g <sup>-1</sup> (6M KOH) | 2737                                               | 226.5                            | S1        |
| glutaraldehyde aqueous solution                                                      | K <sub>2</sub> CO <sub>3</sub> &K <sub>2</sub> B <sub>4</sub> O <sub>7</sub> ·4H <sub>2</sub> O | 0.5 A g <sup>-1</sup> (2M KOH) | 3231                                               | —————                            | S2        |
| CH <sub>3</sub> COOH&(NH <sub>4</sub> ) <sub>2</sub> HPO <sub>4</sub>                | KOH                                                                                             | 0.5 A g <sup>-1</sup> (6M KOH) | 3423                                               | 419.6                            | S3        |
| SiO <sub>2</sub> nanoparticles                                                       | polytetrafluoroethylene                                                                         | 0.5 A g <sup>-1</sup> (6M KOH) | 1011                                               | 250.5                            | S4        |
| glutaraldehyde aqueous solution                                                      | Zinc acetate & Tripotassium Citrate                                                             | 0.5 A g <sup>-1</sup> (6M KOH) | 2042.3                                             | 408.9                            | S5        |
| 700 °C carbonization                                                                 | KOH                                                                                             | 0.2 A g <sup>-1</sup> (6M KOH) | 1129                                               | 316                              | S6        |
| CH <sub>3</sub> COOH & 800 °C carbonization                                          | KOH                                                                                             | 2 mV s <sup>-1</sup> (6M KOH)  | 2435.2                                             | 291.8                            | S7        |
| phytic acid solution & dicyandiamide & glutaraldehyde                                | NaNO <sub>3</sub>                                                                               | 1 A g <sup>-1</sup> (6M KOH)   | 1010.53                                            | 231.2                            | S8        |
| HNO <sub>3</sub> &H <sub>2</sub> SO <sub>4</sub> &HCl &NaOH                          | KOH                                                                                             | 0.2 A g <sup>-1</sup> (6M KOH) | 541                                                | 296                              | S9        |
| SnCl <sub>2</sub> ·2H <sub>2</sub> O                                                 | selenium powder                                                                                 | 0.1 A g <sup>-1</sup> (6M KOH) | 1350                                               | 260.4                            | S10       |
| (NH <sub>4</sub> ) <sub>2</sub> S <sub>2</sub> O <sub>8</sub> & CH <sub>3</sub> COOH | KOH                                                                                             | 0.5 A g <sup>-1</sup> (6M KOH) | 3518                                               | 500                              | This work |

**Table S4.** EIS parameters of PCs, A-PCs, H-PCs, and AH-PCs cathodes.

| <b>Key parameter</b>                             | <b>PCs</b> | <b>A-PCs</b> | <b>H-PCs</b> | <b>AH-PCs</b> |
|--------------------------------------------------|------------|--------------|--------------|---------------|
| Ohmic resistance $R_s$ ( $\Omega$ )              | 0.6428     | 0.6071       | 0.6314       | 0.5723        |
| Charge transfer resistance $R_{ct}$ ( $\Omega$ ) | 0.1253     | 0.1017       | 0.1164       | 0.0834        |



**Table S5.** Comparison of energy density, power density, and cycling performance of AH-PCs and previously reported biomass-derived porous carbon materials in 6 M KOH as electrolyte in a symmetric two-electrode system.

| Precursor                   | Electrolyte | Voltage | Energy density/<br>Power density                         | Current density/<br>Cycle number/<br>Capacity retention                                                    | Ref          |
|-----------------------------|-------------|---------|----------------------------------------------------------|------------------------------------------------------------------------------------------------------------|--------------|
| lignin                      | 6M          | 0-1V    | 5.1 Wh kg <sup>-1</sup> at 500<br>W kg <sup>-1</sup>     | 5 A g <sup>-1</sup><br>1/10000 <sup>th</sup> /90.3%                                                        | S11          |
|                             | KOH         |         |                                                          |                                                                                                            |              |
| glucose                     | KOH/P       | 0-1V    | 10.9 Wh kg <sup>-1</sup> at<br>125 W kg <sup>-1</sup>    | 10 A g <sup>-1</sup><br>1/20000 <sup>th</sup> /89.9%                                                       | S12          |
|                             | VA          |         |                                                          |                                                                                                            |              |
| anthracite                  | 6M          | 0-1V    | 6.8 Wh kg <sup>-1</sup> at<br>123.7 W kg <sup>-1</sup>   | 10 A g <sup>-1</sup><br>1/10000 <sup>th</sup> /98.1%                                                       | S13          |
|                             | KOH         |         |                                                          |                                                                                                            |              |
| Phenol & lignin<br>phenolic | 6M          | 0-1V    | 3.9 Wh kg <sup>-1</sup> at 125<br>W kg <sup>-1</sup>     | 5 A g <sup>-1</sup><br>1/5000 <sup>th</sup> /97.62%                                                        | S14          |
|                             | KOH         |         |                                                          |                                                                                                            |              |
| Linum<br>usitatissimum      | 6M          | 0-1V    | 8.16 Wh kg <sup>-1</sup> at<br>125 W kg <sup>-1</sup>    | 5 A g <sup>-1</sup><br>1/10000 <sup>th</sup> /100%                                                         | S15          |
|                             | KOH         |         |                                                          |                                                                                                            |              |
| Natural apocynum            | 6M          | 0-1V    | 7.65 Wh kg <sup>-1</sup> at<br>500 W kg <sup>-1</sup>    | 5 A g <sup>-1</sup><br>1/10000 <sup>th</sup> /99.33%                                                       | S16          |
|                             | KOH         |         |                                                          |                                                                                                            |              |
| cotton stalks<br>powder     | 6M          | 0-1V    | 9.4Wh kg <sup>-1</sup> at 249<br>W kg kg <sup>-1</sup>   | 5 A g <sup>-1</sup><br>1/10000 <sup>th</sup> /98%                                                          | S17          |
|                             | KOH         |         |                                                          |                                                                                                            |              |
| garlic peels                | 6M          | 0-1V    | 7.42 Wh kg <sup>-1</sup> at<br>314.33 W kg <sup>-1</sup> | 10 A g <sup>-1</sup><br>1/5000 <sup>th</sup> /94.87%                                                       | S18          |
|                             | KOH         |         |                                                          |                                                                                                            |              |
| macadamia nut               | 6M          | 0-1V    | 7.8 Wh kg <sup>-1</sup> at 239<br>W kg <sup>-1</sup>     | 5A g <sup>-1</sup><br>1/7000 <sup>th</sup> /91.4%                                                          | S19          |
|                             | KOH         |         |                                                          |                                                                                                            |              |
| Chitosan                    | 6M          | 0-1.2V  | 7.86 Wh kg <sup>-1</sup> at<br>2620 W kg <sup>-1</sup>   | 5 A g <sup>-1</sup><br>1/10000 <sup>th</sup> /97.3%                                                        | S20          |
|                             | KOH         |         |                                                          |                                                                                                            |              |
| Chitosan                    | 6M<br>KOH   | 0-1V    | 11.44 Wh kg <sup>-1</sup> at<br>125 W kg <sup>-1</sup>   | 10 A g <sup>-1</sup><br>/10000 <sup>th</sup> /100%<br>10 A g <sup>-1</sup><br>/400000 <sup>th</sup> /94.9% | This<br>work |

**Table S6.** Comparison of energy density, power density, and cycling performance of AH-PCs and previously reported porous carbon materials in ZnSO<sub>4</sub> as ZHICs electrode.

| Cathode Material                     | Electrolyte       | Voltage | Energy density/<br>Power density  | Current density/<br>Cycle number/<br>Capacity retention | Ref |
|--------------------------------------|-------------------|---------|-----------------------------------|---------------------------------------------------------|-----|
| Yeast                                | 2M                | 0.2-    | 94.4 Wh kg <sup>-1</sup> at 80.0  | 5 A·g <sup>-1</sup>                                     | S21 |
|                                      | ZnSO <sub>4</sub> | 1.8     | W kg <sup>-1</sup>                | /7000 <sup>th</sup> /100%                               |     |
| Olive leaves                         | 2M                | 0.2-    | 58.3 Wh kg <sup>-1</sup> at 20000 | 10 A·g <sup>-1</sup>                                    | S22 |
|                                      | ZnSO <sub>4</sub> | 1.8     | W kg <sup>-1</sup>                | <sup>1</sup> /20000 <sup>th</sup> /91%                  |     |
| Ti <sub>3</sub> C <sub>2</sub> MXene | 2M                | 0.1-    | 43.89 Wh kg <sup>-1</sup>         | 10 A·g <sup>-1</sup> /10000                             | S23 |
|                                      | ZnSO <sub>4</sub> | 1.3     | at 275.57 W kg <sup>-1</sup>      | <sup>th</sup> /97.8%                                    |     |
| Lignin                               | 2M                | 0.2-    | 107 Wh kg <sup>-1</sup> at 86 W   | -                                                       | S24 |
|                                      | ZnSO <sub>4</sub> | 1.8     | kg <sup>-1</sup>                  |                                                         |     |
| ZIF-8                                | 1M                | 0.2-    | 107.3 Wh kg <sup>-1</sup> at      | 10 A·g <sup>-1</sup>                                    | S25 |
|                                      | ZnSO <sub>4</sub> | 1.8     | 214.9 W kg <sup>-1</sup>          | /10000 <sup>th</sup> /100%                              |     |
| Orange peel                          | 2M                | 0.2-    | 105.2 Wh kg <sup>-1</sup> at      | 10 A·g <sup>-1</sup>                                    | S26 |
|                                      | ZnSO <sub>4</sub> | 1.6     | 71.2 W kg <sup>-1</sup>           | /10000 <sup>th</sup> /86.2%                             |     |
| MOF                                  | 2M                | 0.1-    | 69 Wh kg <sup>-1</sup> at 180 W   | 1 A·g <sup>-1</sup>                                     | S27 |
|                                      | ZnSO <sub>4</sub> | 1.8     | kg <sup>-1</sup>                  | /10000 <sup>th</sup> /97.7%                             |     |
| Furfural                             | 2M                | 0.2-    | 97.8 Wh kg <sup>-1</sup> at 80    | 2 A·g <sup>-1</sup>                                     | S28 |
|                                      | ZnSO <sub>4</sub> | 1.8     | W kg <sup>-1</sup>                | /10000 <sup>th</sup> /98%                               |     |
| Rice husks                           | 2M                | 0.1-    | 58.6 Wh kg <sup>-1</sup> at       | 2 A·g <sup>-1</sup> /3000                               | S29 |
|                                      | ZnSO <sub>4</sub> | 1.8     | 178.6 W kg <sup>-1</sup>          | <sup>th</sup> /95.8%                                    |     |
| Anthracene                           | 3M                | 0.2-    | 109.3 Wh kg <sup>-1</sup> at      | 5 A·g <sup>-1</sup> /10000 <sup>th</sup> /              | S30 |
|                                      | ZnSO <sub>4</sub> | 1.8     | 33.5 W kg <sup>-1</sup>           | 96.2%                                                   |     |
| This Work                            | 2M                | 0.2-    | 137.6 Wh kg <sup>-1</sup> at 80   | 20 A·g <sup>-1</sup> /20000 <sup>th</sup> /             |     |
|                                      | ZnSO <sub>4</sub> | 1.8     | W kg <sup>-1</sup>                | 100%                                                    |     |

## References:

- S1 D. Meng, C. Wu, Y. Hu, Y. Jing, X. Zhang, S. Mahmud, S. P. Su and J. Zhu, *J. Energy Storage*, 2022, **51**, 104341.
- S2 T. Cai, Z. Yang, J. Liu, K. Xu, Y. Gao, F. Zhang, X. Yang and M. Xie, *J. Energy Storage*, 2023, **60**, 106671.
- S3 F. Chen, G. Chen, P. Huang, M. Zheng, Y. Xiao, H. Hu, Y. Liang, Y. Liu and H. Dong, *J. Energy Storage*, 2023, **71**, 108180.
- S4 X. Liu, X. Liu, B. Sun, H. Zhou, A. Fu, Y. Wang, Y. Guo, P. Guo and H. Li, *Carbon*, 2018, **130**, 680-691.
- S5 S. Lv, L. Ma, X. Shen and H. Tong, *J. Alloy. Compd.*, 2022, **895**, 162587.
- S6 Z. Lin, X. Xiang, S. Peng, X. Jiang and L. Hou, *J. Electroanal. Chem.*, 2018, **823**, 563-572.
- S7 P. Hao, Z. Zhao, Y. Leng, J. Tian, Y. Sang, R. I. Boughton, C. P. Wong, H. Liu and B. Yang, *Nano Energy*, 2015, **15**, 9-23.
- S8 J. Xiao, Y. Wang, T. C. Zhang, L. Ouyang and S. Yuan, *J. Power Sources*, 2022, **517**, 230727.
- S9 N. Wang, G. Zhang, T. Guan, J. Wu, J. Wang and K. Li, *Acs Appl. Mater. Interfaces*, 2022, **14**, 13250-13260.
- S10 Y. Lei, X. Liang, L. Yang, P. Jiang, Z. Lei, S. Wu and J. Feng, *J. Mater. Chem. A*, 2020, **8**, 4376-4385.
- S11 M. Zhou, P. Wang, Y. Yu, W. Ma, Z. Cai, F. Ko, M. Li and Q. Wang, *Energy*, 2023, **278**, 127705.
- S12 Y. Yang, D. Chen, W. Han, Y. Cheng, B. Sun, C. Hou, G. Zhao, D. Liu, G. Chen, J. Han and X. Zhang, *Carbon*, 2023, **205**, 1-9.
- S13 G. Han, J. Jia, Y. Yao, X. Zhang, L. Yin, G. Huang, B. Xing and C. Zhang, *J. Energy Storage*, 2023, **68**, 107612.
- S14 P. Li, C. Yang, D. Yi, S. Li, M. Wang, H. Wang, Y. Jin and W. Wu, *Int. J. Biol. Macromol.*, 2023, **252**, 126271.

- S15 W. Tian, P. Ren, J. Wang, X. Hou, A. Sun, Y. Jin and Z. Chen, *J. Energy Storage*, 2023, **63**, 107039.
- S16 Q. Tong, Q. Wang, H. Li, J. Li and W. Yang, *Adv. Sustain. Syst.*, 2023.
- S17 L. Yan, A. Liu, R. Ma, C. Guo, X. Ding, P. Feng, D. Jia, M. Xu, L. Ai, N. Guo and L. Wang, *Appl. Surf. Sci.*, 2023, **615**, 156267.
- S18 S. Liu, K. Dong, F. Guo, Q. Qiao, L. Xu, J. Wang, L. Kong, Y. Zhang, J. Chang and W. Yan, *J. Anal. Appl. Pyrolysis*, 2023, **173**, 106063.
- S19 H. Jia, J. Sun, J. Zhu, F. Zhang, S. Li, Y. Zhang, F. Hu and X. Xie, *J. Energy Storage*, 2023, **60**, 106594.
- S20 Y. Sun, D. Xu, Z. He, Z. Zhang, L. Fan and S. Wang, *J. Mater. Chem. A*, 2023, **11**, 20011-20020.
- S21 Z. Dang, X. Li, Y. Li and L. Dong, *J. Colloid. Interface. Sci.*, 2023, **644**, 221-229.
- S22 H. Li, P. Su, Q. Liao, Y. Liu, Y. Li, X. Niu, X. Liu and K. Wang, *Small*, 2023.
- S23 Z. Li, D. Wang, Z. Sun, S. Chu and P. Chen, *Electrochim. Acta*, 2023, **455**, 142440.
- S24 F. Wen, Y. Yan, S. Sun, X. Li, X. He, Q. Meng, J. Zhe Liu, X. Qiu and W. Zhang, *J. Colloid. Interface. Sci.*, 2023, **640**, 1029-1039.
- S25 X. Zhu, F. Guo, Q. Yang, H. Mi, C. Yang and J. Qiu, *J. Power Sources*, 2021, **506**, 230224.
- S26 J. Yu, X. Jia, J. Peng, B. Meng, Y. Wei, X. Hou, J. Zhao, N. Yang, K. Xie, D. Chu and L. Li, *Acs Appl. Energ. Mater.*, 2023, **6**, 2728-2738.
- S27 X. Wang, H. Hong, S. Yang, S. Bai, R. Yang, X. Jin, C. Zhi and B. Wang, *Inorg. Chem. Front.*, 2023, **10**, 2115-2124.
- S28 X. Li, J. Hu, M. Wu, C. Guo, L. Bai, J. Li, Y. Li, D. Luo, J. Duan, X. Li and Z. Li, *Carbon*, 2023, **205**, 226-235.
- S29 Y. Liu, H. Tan, Z. Tan and X. Cheng, *Appl. Surf. Sci.*, 2023, **608**, 155215.
- S30 F. Wei, H. Tian, P. Chen, Y. Lv and J. Huang, *Appl. Surf. Sci.*, 2023, **613**, 156021.
